# Supplementary material for: Non-negligible secondary contribution to brown carbon in autumn and winter: inspiration from particulate nitrated and oxygenated aromatic compounds in urban Beijing
Source: Copernicus journal article supplement (doi:10.5194/egusphere-2023-2593), 2024-01-03
Supplement: Supplementary file 1 [file egusphere-2023-2593-supplement.pdf]

**Non-negligible secondary contribution to brown carbon in autumn and winter: inspiration on particulate nitrated and oxygenated aromatic compounds in urban Beijing**

Yanqin Ren<sup>1</sup>, Zhenhai Wu<sup>1</sup>, Yuanyuan Ji<sup>1</sup>, Fang Bi<sup>1</sup>, Junling Li<sup>1</sup>, Haijie Zhang<sup>1</sup>, Hao Zhang<sup>1</sup>, Hong Li<sup>1\*</sup>, Gehui Wang<sup>2\*</sup>

<sup>1</sup> State Key Laboratory of Environmental Criteria and Risk Assessment, Chinese Research Academy of Environmental Sciences, Beijing 100012, China

<sup>2</sup> Key Lab of Geographic Information Science of Ministry of Education of China, School of Geographic Sciences, East China Normal University, Shanghai 200142, China

\*Corresponding authors: Dr. Gehui Wang/ Dr. Hong Li

E-mail address: [ghwang@geo.ecnu.edu.cn](mailto:ghwang@geo.ecnu.edu.cn) / [lihong@craes.org.cn](mailto:lihong@craes.org.cn)

Table S1. Concentrations of nitrated and oxygenated aromatic compounds in PM<sub>2.5</sub> during the sampling periods in Beijing.

|                                                                            | The whole sampling<br>N=122    | Before Heating Period<br>18/10–14/11<br>N=56 | Heating Period<br>15/11–23/11, 23/12–17/1<br>N=66 |
|----------------------------------------------------------------------------|--------------------------------|----------------------------------------------|---------------------------------------------------|
| <b>Nitrated aromatic compounds (NACs, ng m<sup>-3</sup>)</b>               |                                |                                              |                                                   |
| 4-nitrophenol(4NP)                                                         | 14 ± 14 (0.75 – 94)            | 6.6 ± 4.5 (0.75 – 19)                        | 20 ± 17 (2.0 – 94)                                |
| 3-methyl-4-nitrophenol(3M4NP)                                              | 3.7 ± 4.6 (0.13 – 26)          | 0.99 ± 0.79 (0.13 – 4.3)                     | 6.1 ± 5.2 (0.83 – 26)                             |
| 2,4-dinitrophenol(2,4-DNP)                                                 | 2.4 ± 4.6 (0.01 – 24)          | 3.4 ± 5.6 (0.01 – 24)                        | 1.6 ± 3.3 (0.02 – 17)                             |
| 4-nitroguaiacol(4NGA)                                                      | 1.8 ± 2.0 (0.02 – 11)          | 0.52 ± 0.46 (0.02 – 2.7)                     | 2.8 ± 2.2 (0.39 – 11)                             |
| 5-nitroguaiacol(5NGA)                                                      | 0.06 ± 0.04 (0.01 – 0.39)      | 0.04 ± 0.03 (0.01 – 0.16)                    | 0.07 ± 0.05 (0.01 – 0.39)                         |
| 4-nitrocatechol(4NC)                                                       | 11 ± 16 (NA <sup>a</sup> – 87) | 5.4 ± 8.6 (NA – 54)                          | 16 ± 19 (0.19 – 87)                               |
| 4-methyl-5-nitrocatechol(4M5NC)                                            | 3.6 ± 5.6 (NA – 28)            | 1.9 ± 3.4 (NA – 23)                          | 5.1 ± 6.6 (0.04 – 28)                             |
| 3-nitrosalicylic acid(3NSA)                                                | 0.59 ± 0.80 (NA – 3.5)         | 0.33 ± 0.53 (NA – 3.6)                       | 0.81 ± 0.93 (0.02 – 3.5)                          |
| 3-nitrosalicylic acid(5NSA)                                                | 0.78 ± 0.91 (NA – 4.5)         | 0.43 ± 0.54 (NA – 2.7)                       | 1.1 ± 1.0 (0.03 – 4.5)                            |
| ∑9NACs                                                                     | 38 ± 44 (1.2 – 263)            | 20 ± 21 (1.2 – 108)                          | 53 ± 51 (4.5 – 263)                               |
| ∑9NACs/OM (%)                                                              | 0.25 ± 0.17 (0.03 – 0.86)      | 0.15 ± 0.09 (0.03 – 0.44)                    | 0.33 ± 0.17 (0.09 – 0.86)                         |
| <b>Oxygenated polycyclic aromatic compounds (OPAHs, ng m<sup>-3</sup>)</b> |                                |                                              |                                                   |
| 1-naphthaldehyde(1-NapA)                                                   | 20 ± 18 (0.81 – 90)            | 18 ± 16 (0.81 – 88)                          | 22 ± 18 (2.1 – 90)                                |
| 9-fluorenone(9-FO)                                                         | 1.8 ± 1.9 (0.06 – 9.2)         | 0.33 ± 0.23 (0.06 – 1.1)                     | 3.1 ± 1.9 (0.49 – 9.2)                            |
| Anthraquinone(ATQ)                                                         | 11 ± 12 (0.4 – 62)             | 2.8 ± 2.1 (0.4 – 11)                         | 18 ± 12 (2.4 – 62)                                |
| Benzathrone(BZA)                                                           | 6.6 ± 9.0 (0.002 – 49)         | 3.7 ± 6.5 (0.002 – 39)                       | 9.1 ± 10 (0.31 – 49)                              |
| benzo(a)anthracene-7,12-dione(7,12-BaAQ)                                   | 1.3 ± 1.6 (NA – 9.0)           | 0.61 ± 0.77 (NA – 4.6)                       | 1.9 ± 1.8 (0.10 – 9.0)                            |
| 1,4-chrysenequione(1,4-CQ)                                                 | 5.5 ± 10 (NA – 98)             | 4.8 ± 14 (NA – 98)                           | 6.1 ± 6.1 (0.45 – 28)                             |
| 5,12-naphthacenequione(5,12-NAQ)                                           | 0.93 ± 1.4 (NA – 8.1)          | 0.41 ± 0.78 (NA – 4.4)                       | 1.4 ± 1.6 (0.08 – 8.1)                            |
| 6H-benzo(cd)pyrene-6-one(BPYRone)                                          | 0.38 ± 0.36 (NA – 1.8)         | 0.27 ± 0.26 (NA – 1.7)                       | 0.47 ± 0.40 (NA – 1.8)                            |
| ∑8OPAHs                                                                    | 47 ± 44 (2.1 – 234)            | 31 ± 36 (2.1 – 234)                          | 61 ± 45 (6.9 – 218)                               |
| ∑8OPAHs/OM                                                                 | 0.33 ± 0.15 (0.06 – 0.81)      | 0.24 ± 0.16 (0.06 – 0.81)                    | 0.40 ± 0.10 (0.18 – 0.58)                         |

<sup>a</sup> NA: not available.

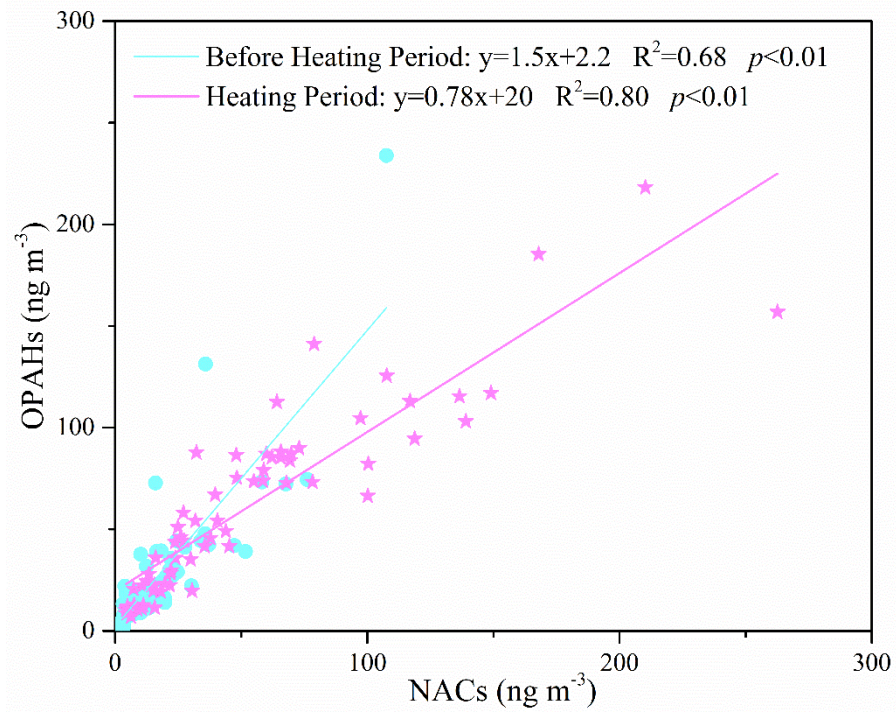

Fig.S1 Linear fit regressions of OPAHs with NACs before and during heating period.
